# Supplementary material
Source: Springer Nature journal article supplement (https://www.springermedizin.de/resource/supplementary/12967_2013_2102_MOESM9_ESM.pdf/9575236)

## A Correlation Histograms

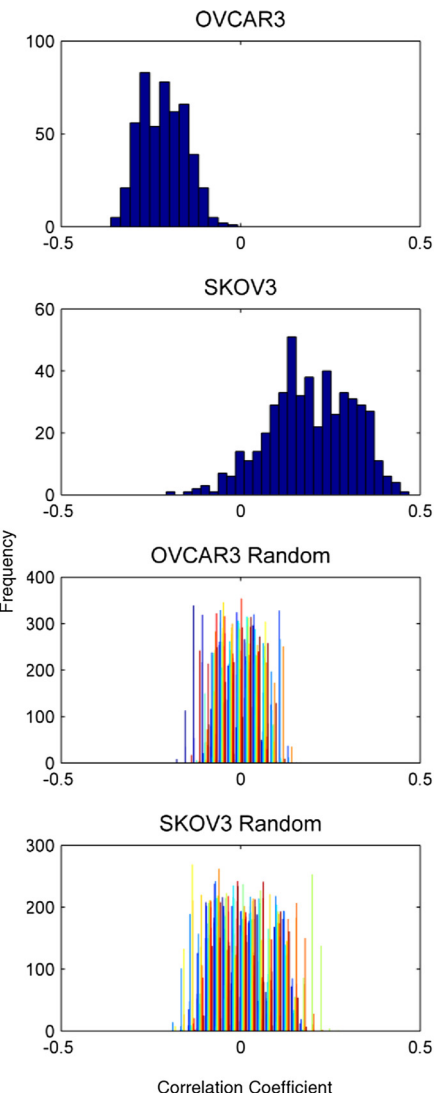

## B P-value vs. Correlation Coefficient Scatterplots

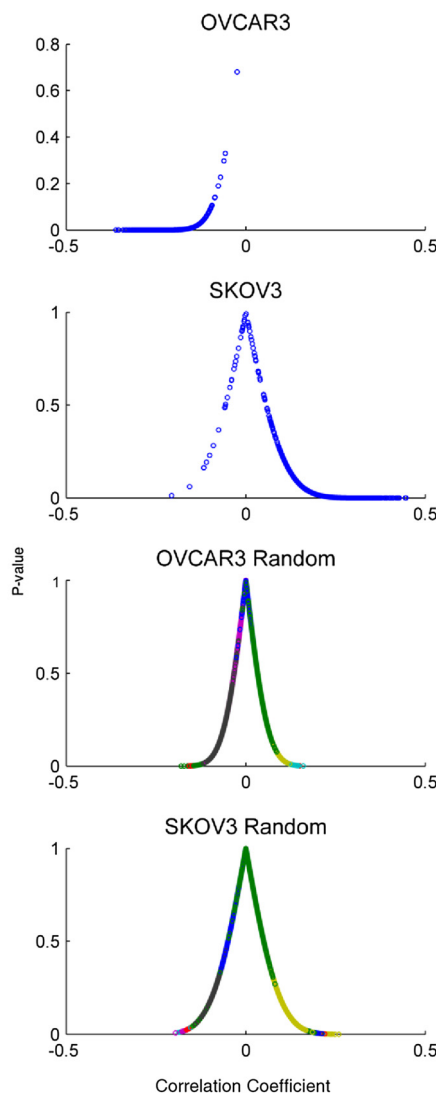

Supplement: MOESM9 [file 9575236]
